# Supplementary material for: Characterising open chromatin in chick embryos identifies cis-regulatory elements important for paraxial mesoderm formation and axis extension
Source: PubMed Central journal article supplement (PMC7895974; doi:10.1038/s41467-021-21426-7), 2021-02-19
Supplement: 41467_2021_21426_MOESM1_ESM.pdf [file 41467_2021_21426_MOESM1_ESM.pdf]

## Supplementary Figures and legends

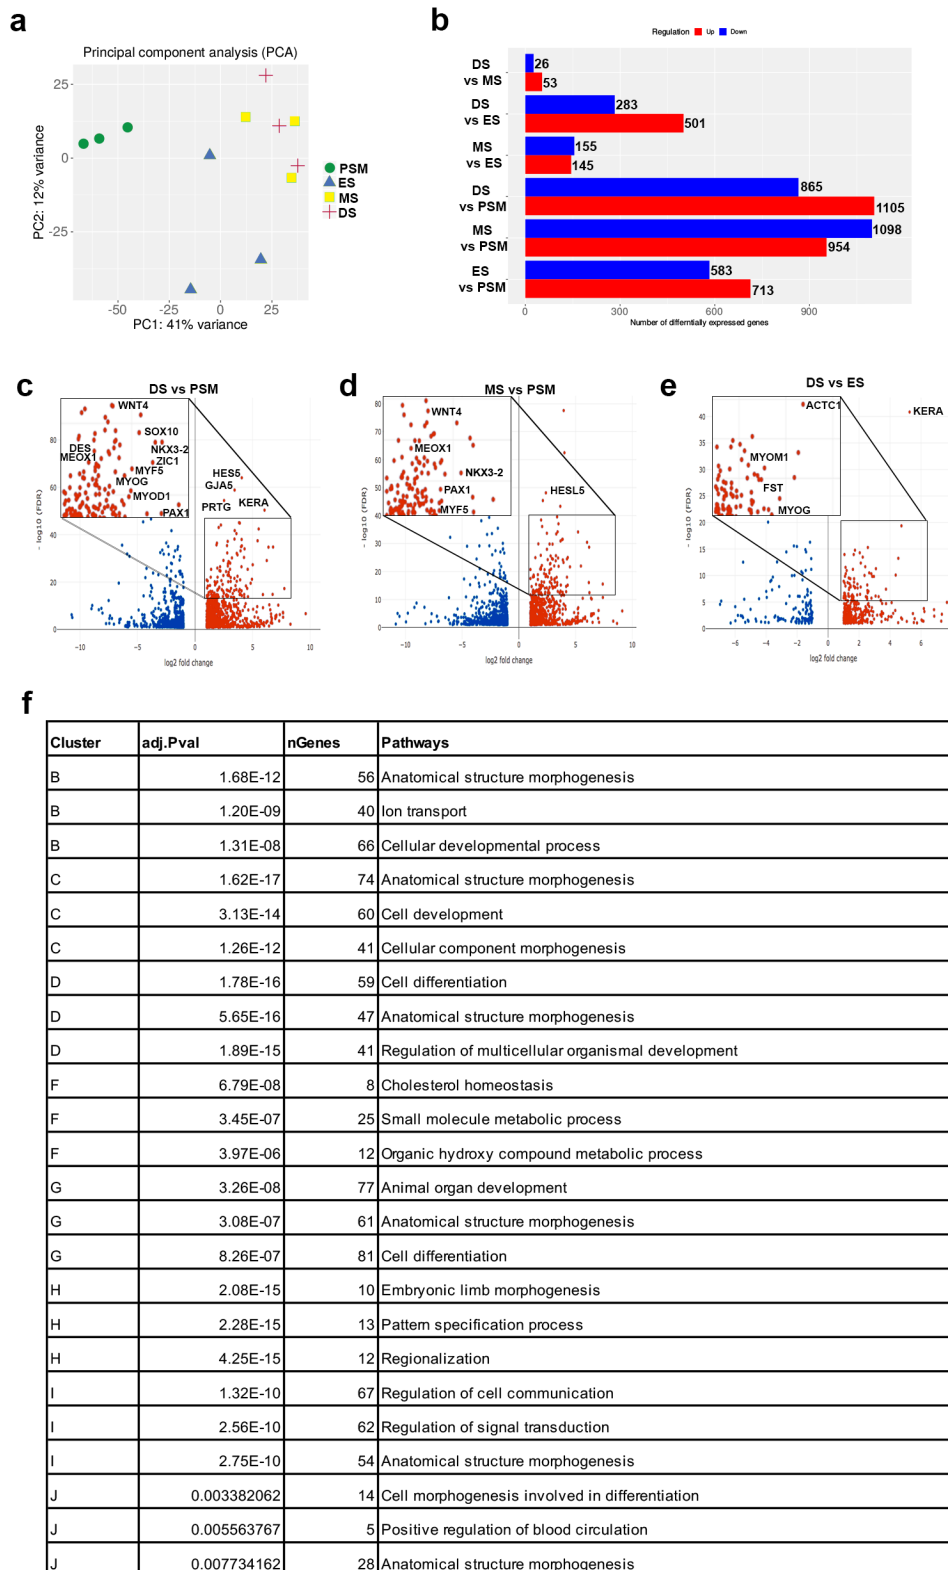

**Supplementary Fig. 1: Transcriptional profiling of developing somites.** **a** PCA plot of PSM, ES, MS and DS replicates. **b** Number of differentially expressed (upregulated, red; downregulated, blue) genes comparing PSM, ES, MS and DS. **c-e** Volcano plots showing enriched genes (Log Fold Change >1) comparing DS vs PSM, **(d)** MS vs PSM and **(e)** ES vs PSM. **f** GO analysis on k-means cluster showing associated terms, adjusted P-values and number of genes in each associated term.

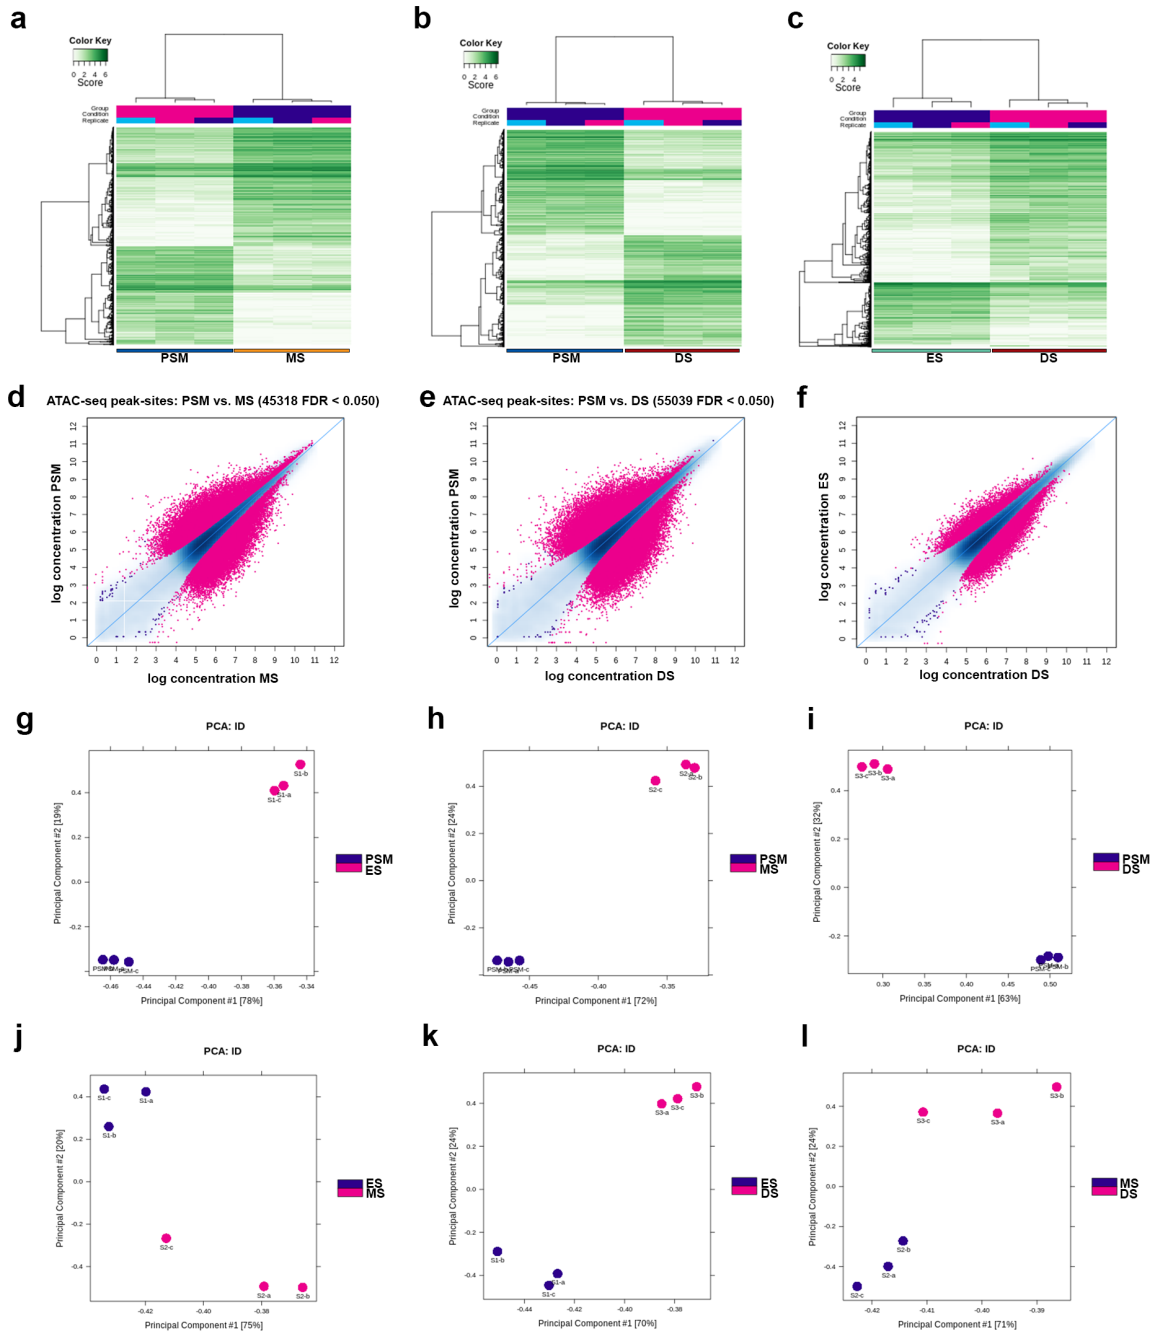

**Supplementary Fig. 2: Genome-wide profile of chromatin accessibility dynamics during somite development.** **a** Correlation heat maps of accessible chromatin regions (ATAC-seq peak-sites) comparing PSM and MS, **(b)** PSM and DS and **(c)** ES and DS. **d** MA plots of significantly differential peak-sites in PSM with MS, **(e)** ES with DS and **(f)** ES with DS. **g-l** PCA plots using only the differentially accessible peak-sites using an FDR threshold of 0.05.

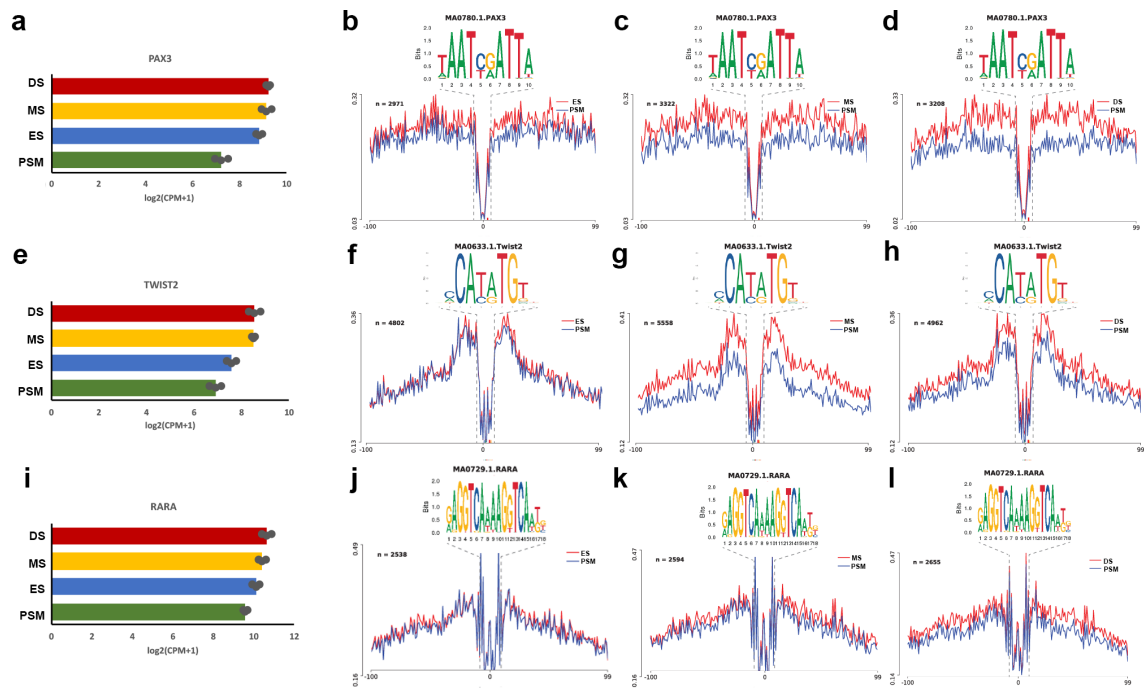

**Supplementary Fig. 3: Differential footprints identified for key paraxial mesoderm transcription factors.** **a** Gene expression for *Pax3* from mRNA-seq (error bars = SEM,  $n = 3$ ). **b** Tn5 insertion frequency across all accessible regions containing at least one *Pax3* motif, at nucleotide resolution in PSM, ES, MS and DS reveals presence of a footprint centered on the *Pax3* motif. Differential footprinting for *Pax3* motif comparing PSM (blue) and ES (red), (**c**) PSM (blue) and MS (red) and (**d**) PSM (blue) and DS (red). **e** Gene expression for *Twist2* from mRNA-seq (error bars = SEM,  $n = 3$ ). **f** Differential footprinting for *Twist2* motif comparing PSM (blue) and ES (red), (**g**) PSM (blue) and MS (red) and (**h**) PSM (blue) and DS (red). **i** Gene expression for *RARA* from mRNA-seq (error bars = SEM,  $n = 3$ ). **j** Differential footprinting for *RARA* motif comparing PSM (blue) and ES (red), (**k**) PSM (blue) and MS (red) and (**l**) PSM (blue) and DS (red). The total number of footprints detected is shown in each panel,  $n$ .

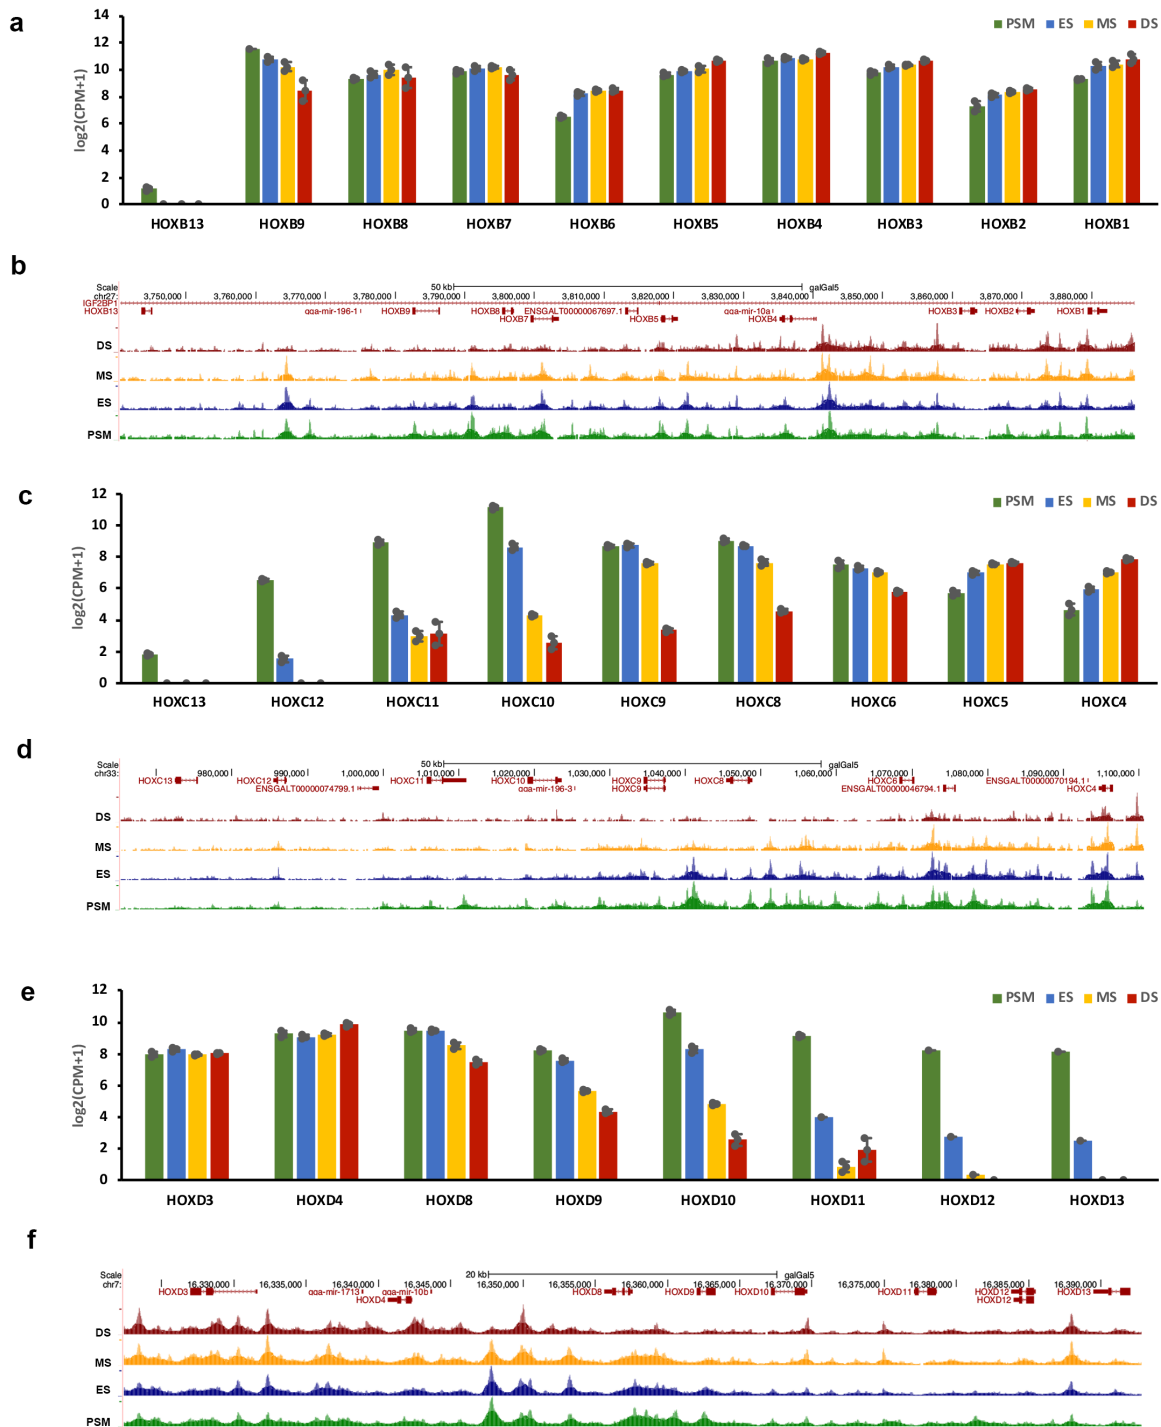

**Supplementary Fig. 4: Chromatin accessibility and gene expression for *HoxB*, *HoxC* and *HoxD* clusters.** **a** Gene expression from mRNA-seq for *HoxB* cluster (error bars = SEM, n = 3). **b** Genome browser views of ATAC-seq profile at *HoxB* cluster. **c** Gene expression from mRNA-seq for *HoxC* cluster (error bars = SEM, n = 3). **d** Genome browser views of ATAC-seq profile at *HoxC* cluster. **e** Gene expression from mRNA-seq for *HoxD* cluster (error bars = SEM, n = 3). **f** Genome browser views of ATAC-seq profile at *HoxD* cluster. PSM ATAC is shown in green, ES shown in blue, MS shown in yellow and DS in red.

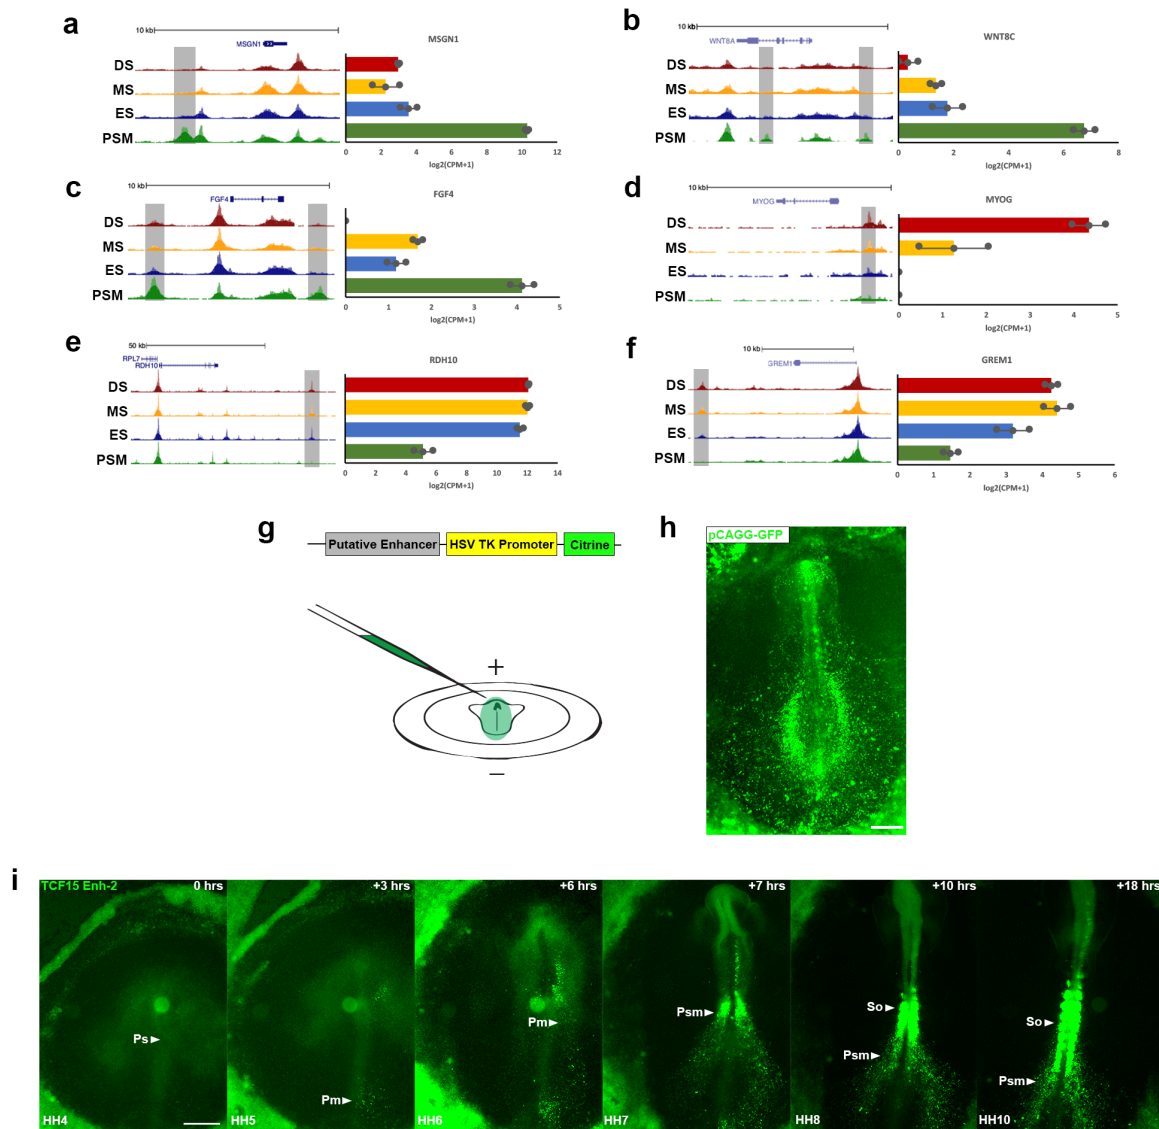

**Supplementary Fig. 5: Differential chromatin accessibility highlights putative CREs and time-lapse imaging reveals *TCF15* Enh-2 activity in prospective paraxial mesoderm and somites. a-f** Examples of ATAC-seq accessible regions that define PSM (*Mgn1*, *Wnt8c*, *Fgf4*) or DS (*MyoG*) or developing somites (*Rdh10*, *Greml1*). Gene expression from mRNA-seq (error bars = SEM, n = 3) is shown in the bar charts on the right. Grey bars are examples of differential accessible regions across the four samples flanking the gene locus. **g** Schematic representation of putative enhancer Citrine reporter construct. Injection of constructs into HH3+ chick embryos with positive electrode at the top and negative electrode at the bottom. **h** Electroporation of pCAGG-GFP at HH3+, embryo developed for 20 hours showing electroporation efficiency. **i** Still images from a time-lapse movie of *TCF15* Enh-2 with the primitive streak (Ps) indicated. Fluorescent activity first observed in paraxial mesoderm (Pm) at HH6 and continuous expression in the paraxial mesoderm (Psm) at HH7 prior to expression in somites (So) at HH8 and HH10. Scale bars = 500 microns

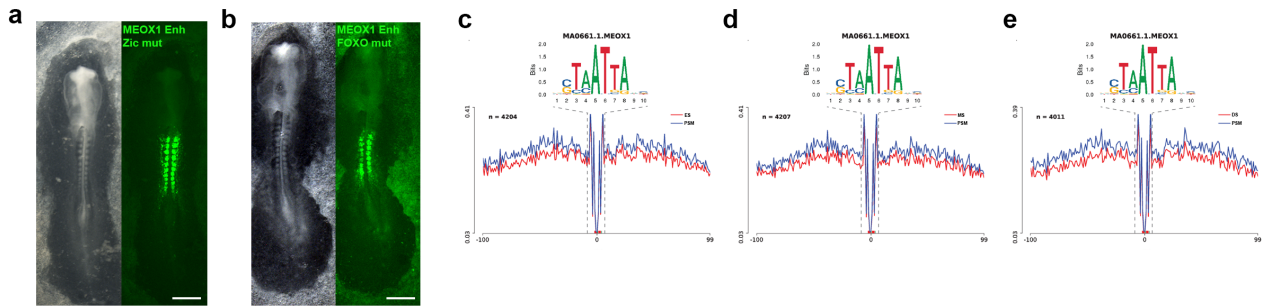

**Supplementary Fig. 6: *MEOX1* enhancer reporter single mutants and *MEOX1* footprints across different samples.** **a-b** *MEOX1* Enh reporter constructs with mutation in either **(a)** ZIC ( $n = 4/4$ ) or **(b)** FOXO ( $n = 5/5$ ) transcription factor binding sites show normal activity after electroporation into gastrula stage chick embryos. **c** Differential footprints for *MEOX1* motif comparing PSM (blue) and ES (red), **(d)** PSM (blue) and MS (red) and **(e)** PSM (blue) and DS (red). Total number of footprints shown on each panel,  $n$ .

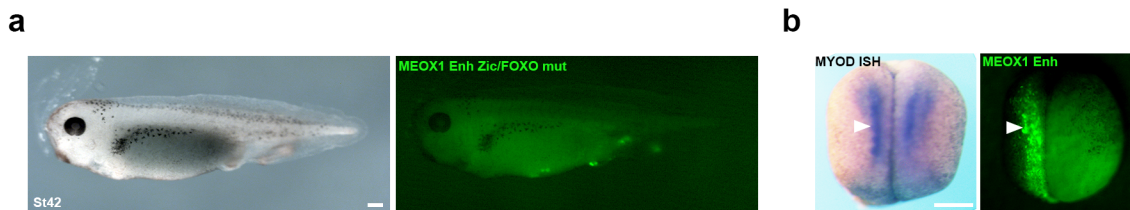

**Supplementary Fig. 7: Testing avian putative *Meox1* Enhancer in *Xenopus*.** **a** *MEOX1* Enh with both Zic and FOXO mutations injected in *Xenopus* embryos. Activity is not observed in stage 42 embryos ( $n = 20/20$ ). **b** *MEOX1* Enh shows expression similar to early paraxial mesoderm marker (*MYOD*) in gastrula-stage embryos. *MYOD* in situ hybridisation performed on same stage. Purple shows expression in paraxial mesoderm (white arrow heads,  $n = 10/10$ ). Scale bars = 250 microns

**Supplementary Table 1. Primers and sgRNAs.**

| Name of primer                   | Primer sequence                                    |
|----------------------------------|----------------------------------------------------|
| MEOX1 Enh F                      | TTTTTCGTCTCgccaggCTTGCAGTCCTTTGATCCACC             |
| MEOX1 Enh R                      | TTTTTCGTCTCcaacagAGAGCCCAGA GTGGTTTTGC C           |
| TCF15 Enh-1 F                    | TTTTTCGTCTCgccaggACACACAGCAGCGGGTCGGTGCC           |
| TCF15 Enh-1 R                    | TTTTTCGTCTCcaacagGAGCAGGCAG GTGCCTGCAG CC          |
| TCF15 Enh-2 F                    | TTTTTCGTCTCgccaggTTGCACCTCGTGCTCAGGGTCTG           |
| TCF15 Enh-2 R                    | TTTTTCGTCTCcaacagTGGAGGAAGG TGTGTGCCAG CAG         |
| Human MEOX1 Enh F                | TTTTTCGTCTCgccaggAATGTGGCTCCCTTCTAGC               |
| Human MEOX1 Enh R                | TTTTTCGTCTCcaacagCAGCCGGTAACAGGCAAGGT              |
| MEOX1 gRNA-1 F                   | TTTCGTCTCcAGTCgCCAAGCCCATTGTTGGACGgtttaGAGACGAAA   |
| MEOX1 gRNA-1 R                   | TTTCGTCTCtaaacCGTCCAACAAATGGGCTTGGcGACTgGAGACGAAA  |
| MEOX1 gRNA-2 F                   | TTTCGTCTCcAGTCgCAGAGAGTGCTGGGGCAATGgtttaGAGACGAAA  |
| MEOX1 gRNA-2 R                   | TTTCGTCTCtaaacCATTGCCCCAGCACTCTCTGcGACTgGAGACGAAA  |
| MEOX1 gRNA-3 F                   | TTTCGTCTCcAGTCgAGGGCAAACAAGCCCCCGTgtttaGAGACGAAA   |
| MEOX1 gRNA-3 R                   | TTTCGTCTCtaaacAGCGGGGGCTTGTTCGCCcGACTgGAGACGAAA    |
| MEOX1 gRNA-4 F                   | TTTCGTCTCcAGTCgTCCTGACACTTCATTCCCTGAgtttaGAGACGAAA |
| MEOX1 gRNA-4 R                   | TTTCGTCTCtaaacTCAGGAATGAAGTGTTCAGGAcGACTgGAGACGAAA |
| TCF15 gRNA-1 F                   | TTTCGTCTCcAGTCgGGGATTACGGGCTCTGCACgtttaGAGACGAAA   |
| TCF15 gRNA-1 R                   | TTTCGTCTCtaaacGTGCAGAGCCCGTAAATCCcGACTgGAGACGAAA   |
| TCF15 gRNA-2 F                   | TTTCGTCTCcAGTCgGGCAAATGGTGAAGGCAAACgtttaGAGACGAAA  |
| TCF15 gRNA-2 R                   | TTTCGTCTCtaaacGTTTGCCTTACCATTTCGCCcGACTgGAGACGAAA  |
| TCF15 gRNA-3 F                   | TTTCGTCTCcAGTCgGGGGGGCCTTTTGTCTCGAgtttaGAGACGAAA   |
| TCF15 gRNA-3 R                   | TTTCGTCTCtaaacTCAGGAGCAAAAGGCCCCcGACTgGAGACGAAA    |
| TCF15 gRNA-4 F                   | TTTCGTCTCcAGTCgGGGCTGTCCATGTGTAACgtttaGAGACGAAA    |
| TCF15 gRNA-4 R                   | TTTCGTCTCtaaacGTTACACATGAGGACAGCCcGACTgGAGACGAAA   |
| Scrambled control gRNA F         | TTTCGTCTCcAGTCgTGCAGTGCTTCAGCCGCTgtttaGAGACGAAA    |
| Scrambled control gRNA R         | TTTCGTCTCtaaacAGCGGCTGAAGCACTGCAcGACTgGAGACGAAA    |
| MEOX1 Enh FOXO1 ZIC3 Mut F       | GGGCCACCAGAATTCCTTCCTCAGGAATGAAGTGTGACG            |
| MEOX1 Enh FOXO1 ZIC3 Mut R       | CTGTCTGCTCACTCAGCAGCCAG                            |
| TCF15 Enh-2 RARA Mut F           | TGGTTCCTTCAAACAGGGTCAGGGCCCTCAGCAA                 |
| TCF15 Enh-2 RARA Mut R           | ACCCTGTTTGAAGGAACCATTGTCTCCTGTGCAGAGCCCGTAAA       |
| Human MEOX1 Enh FOXO1 ZIC3 Mut F | TCTGGCACCCCGGAG                                    |
| Human MEOX1 Enh FOXO1 ZIC3 Mut R | GTGCCCGGCCTTCAT                                    |
| cMEOX1 RT F                      | GAGATCGCTGTGAACCTGG                                |
| cMEOX1 RT R                      | CGCTTCCACTTCATCCTTCT                               |
| cMEOX2 RT F                      | AGCAGTAAACCTTGACCTCAC                              |
| cMEOX2 RT R                      | CATTCACCAGTTCCTTTTCCG                              |
| cPax3 RT F                       | AGCAGAGCAACTGGAAGAGC                               |
| cPax3 RT R                       | GGTGGTTGAAAGCCATCAGT                               |
| cGAPDH RT F                      | TCTCTGGCAAAGTCCAAGTG                               |
| cGAPDH RT R                      | TCACAAGTTCCCGTTCTCAG                               |
| cFAT4 RT F                       | TGGCAGCTCAAGGAATCTTAG                              |
| cFAT4 RT R                       | GGCAGTGTCCGAGTAATATC                               |
| cTGFB2 RT F                      | TTGATGTCACTGAGGCTGTAC                              |
| cTGFB2 RT R                      | CAAATCTTGTTCAGGCTCC                                |
| cUNCX RT F                       | CCTGGCTGTAAGAGGAGACG                               |
| cUNCX RT R                       | CGGCTCGTTGAAAGAGAAAC                               |
| cTBX18 RT F                      | GTAATGCTGACTCCCGGTA                                |
| cTBX18 RT R                      | GTGGACACGAGGCTGGTATT                               |
| cNKX3-2 RT F                     | GACGCAGGTGAAGATCTGGT                               |
| cNKX3-2 RT R                     | GGCAGGCAGTAGTAGGGGTA                               |
| MEOX1 Enh FOXO1 Mut F            | AGGGCTGTTGTTTTT                                    |
| MEOX1 Enh FOXO1 Mut R            | AAAAACAACAGCCCTCCCCTCTTGCCCAA                      |
| MEOX1 Enh ZIC3 Mut F             | GGCAAACAAGCCCC                                     |
| MEOX1 Enh ZIC3 Mut R             | GGGGCTGTTTGGCCCTTGCATCT                            |
