# Supplementary material for: Characterising open chromatin in chick embryos identifies cis-regulatory elements important for paraxial mesoderm formation and axis extension
Source: PubMed Central journal article supplement (PMC7895974; doi:10.1038/s41467-021-21426-7), 2021-02-19
Supplement: 41467_2021_21426_MOESM6_ESM.pdf [file 41467_2021_21426_MOESM6_ESM.pdf]

**Title:** Supplementary Movie 1

**Description:** Time-lapse of TCF15 Enh2 Citrine-reporter construct electroporated into chick gastrula stage embryos. Brightfield and darkfield views of *TCF15* enhancer activity. In each panel anterior is to the left, posterior is to the right.

**Title:** Supplementary Movie 2

**Description:** Time-lapse of MEOX1 Enh Citrine-reporter construct electroporated into chick gastrula stage embryos. Brightfield and darkfield views of *MEOX1* enhancer activity. In each panel anterior is to the left, posterior is to the right.
